# Supplementary material
Source: PubMed Central journal article supplement (PMC5925729)
Supplement: JCM.01950-17_zjm999095938s1.pdf [file JCM.01950-17_zjm999095938s1.pdf]

1 **Appendix**

2 **Figures**

3

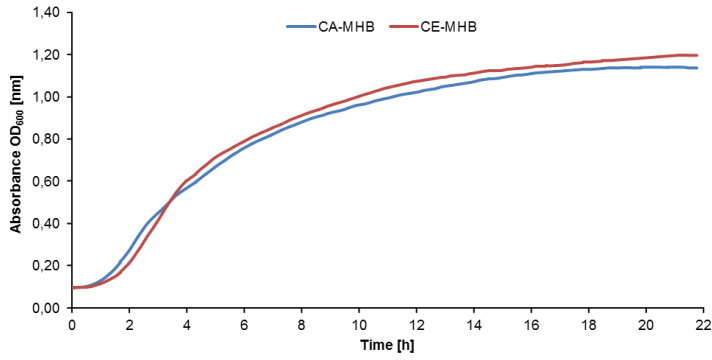

4

5 Figure A1. Growth curves of representative *E. coli* in the cation-adjusted Mueller-Hinton (CA-  
6 MH) broth and cation-enhanced Mueller-Hinton (CE-MH) broth. The concentration of calcium  
7 present in CE-MH has no adverse effects on bacterial growth.

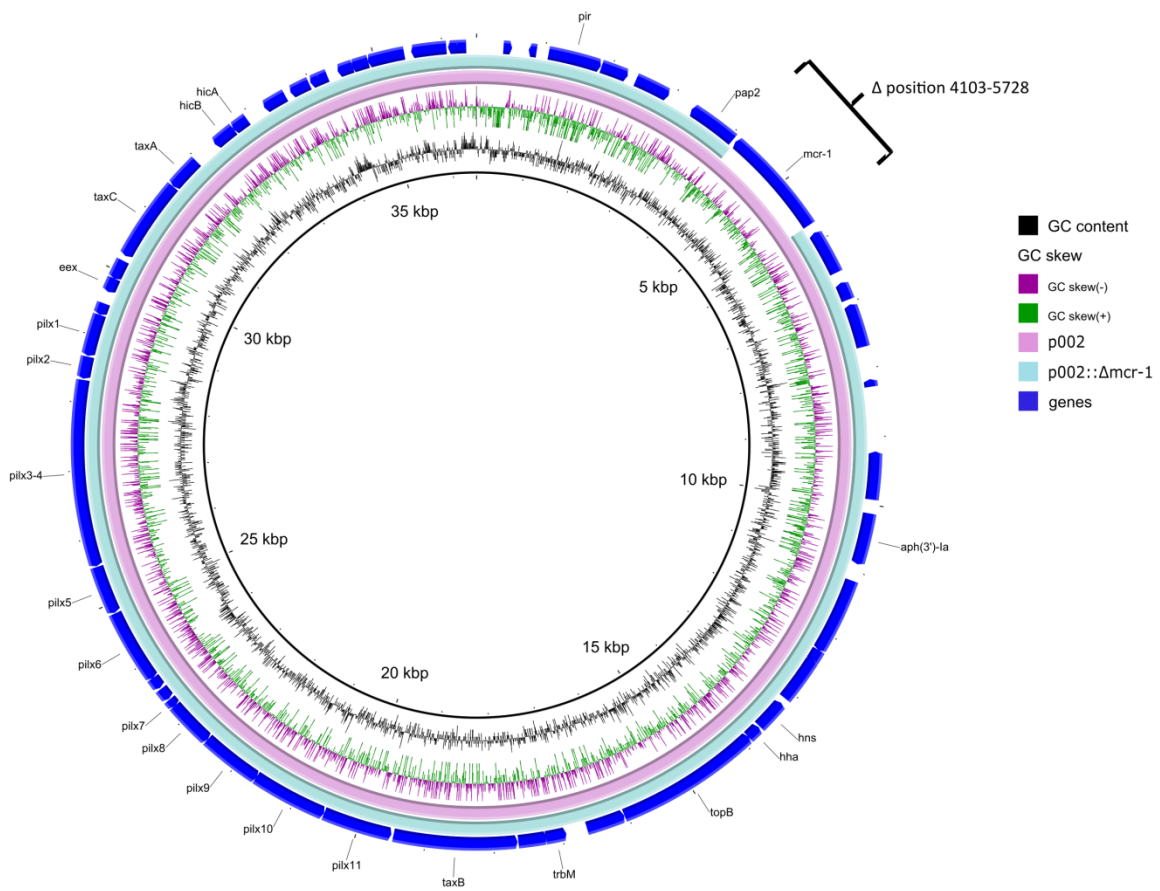

8

9 Figure A2 Map of *mcr-I*-encoding IncX4 plasmids used in the study. p002 and p002::*Δmcr-I* have  
 10 identical sequences apart from the absence of the *mcr-I* gene in the latter plasmid (marked with  
 11 the bracket).

12

13

14

15

16

17 **Tables**

18 Table A1 The colistin MIC susceptibility for a subset of isolates encoding the *mcr-1* gene  
 19 determined by microdilution method in the reference cation-adjusted Mueller Hinton (CA-MH)  
 20 broth containing 20% of heat-inactivated normal human serum (iNHS).

| Isolate (Inc group)               | Broth microdilution MIC* [mg/L] |                                 |
|-----------------------------------|---------------------------------|---------------------------------|
|                                   | CA-MH                           | CA-MH supplemented with 20% NHS |
| <i>E. coli</i> _001 (IncHI2)      | 4                               | 6                               |
| <i>E. coli</i> _002 (IncX4)       | 4                               | 6                               |
| <i>E. coli</i> _006 (IncX4)       | 4                               | 6                               |
| <i>E. coli</i> _018 (chromosomal) | 4                               | 6                               |
| <i>E. coli</i> _055 (ND)          | 4                               | 6                               |
| <i>E. coli</i> DO14** (NA)        | 0.5                             | 0.5                             |
| <i>E. coli</i> DO21** (NA)        | 0.5                             | 0.5                             |
| <i>E. coli</i> _017** (NA)        | 0.5                             | 0.5                             |

21 \*The MIC is defined as the lowest concentration of the colistin that inhibits visible growth of the tested isolate as  
 22 observed with the unaided eye, \*\* *mcr-1*-negative isolate, ND – not determined, NA – not applicable

23 Table A2 Essential and categorical agreements between colistin MIC values obtained in the  
 24 reference cation-adjusted Mueller-Hinton (CA-MH) broth and cation-enhanced Mueller-Hinton  
 25 (CE-MH) broth determined by broth microdilution (BMD) and Strip-based methods.

|                                           | Susceptibility testing method | Colistin-susceptible | Colistin-resistant (n=68) |
|-------------------------------------------|-------------------------------|----------------------|---------------------------|
|                                           |                               | (n=32)               |                           |
| % Essential agreement (EA) <sup>a</sup>   | BMD                           | 91                   | 24                        |
|                                           | Strip-based                   | 100                  | 13                        |
| % Categorical agreement (CA) <sup>b</sup> | BMD                           | 91                   | 99                        |
|                                           | Strip-based                   | 100                  | 87                        |

26 <sup>a</sup> MICs being within ± 1 dilution of reference MICs.

27 <sup>b</sup> Test results with correct susceptibility categorization.

28

29 Table A3 The colistin quality control results for broth microdilution and strip-based methods in  
 30 calcium-enhanced Mueller-Hinton (CE-MH) broth performed according to the 15 replicate (3 x 5  
 31 day) plan.

| Colistin MIC<br>method | Colistin MIC [mg/L]       |    |                           |    |                     |    |                      |    |                     |    |    |
|------------------------|---------------------------|----|---------------------------|----|---------------------|----|----------------------|----|---------------------|----|----|
|                        | <i>E. coli</i> ATCC 25922 |    | <i>E. coli</i> NCTC 13846 |    | <i>E. coli</i> _010 |    | <i>E. coli</i> CLO28 |    | <i>E. coli</i> _051 |    |    |
|                        | 0.5                       | 1  | 1.5                       | 6  | 32                  | 1  | 2                    | 1  | 1.5                 | 16 | 32 |
| Broth microdilution    | 1                         | 14 |                           |    | 15                  | 13 | 2                    | 15 |                     | 1  | 14 |
| Strip-based test       |                           | 2  | 13                        | 15 |                     | 1  | 14                   | 13 | 2                   | 15 |    |

32  
 33 Table A4 The nucleotide sequence of the primer used for introduction of substitution (D149Y) into  
 34 *pmrB* gene of *E. coli* MG1655 by pORTMAGE system.

| Primer              | Sequence 5'→3'                                                                           |
|---------------------|------------------------------------------------------------------------------------------|
| portMAGE_pmrB_D149Y | gtcgctgaccagcagcgtggataacgaaaggtgtttaccgcttacgtcgcgcacgaactgcaacgccactggcgggggtgcgtttgc* |

35 \* The oligonucleotide contains phosphorothioate linkages at both 5' and 3' termini for protection against endogenous nucleases.

36  
 37 Table A5 The nucleotide sequences of the primers used for deletion of *mcr-1* gene from IncX4  
 38 plasmid p002.

| Primer                        | Sequence 5'→3'                                   |
|-------------------------------|--------------------------------------------------|
| $\Delta mcr-1$ _Fragment1_FOR | ttccatctcaacagatctctgattcgaacc                   |
| $\Delta mcr-1$ _Fragment1_REV | ttgtctgtttcgaaaagattatcgtggattgt                 |
| $\Delta mcr-1$ _Fragment2_FOR | gttataacaatccacgataatctttcgaaaacagaca            |
| $\Delta mcr-1$ _Fragment2_REV | tatttttgagtagtttctcttctccctgtatttttccaaaccacc    |
| $\Delta mcr-1$ _Fragment3_FOR | ggaaaaatacagggagaaagagaactactcaaaaaataaacggtggga |
| $\Delta mcr-1$ _Fragment3_REV | tgggctgtggttcgaatcagagatctgttga                  |

39  
 40  
 41
